# Supplementary material for: The TARGET cohort study protocol: a prospective primary care cohort study to derive and validate a clinical prediction rule to improve the targeting of antibiotics in children with respiratory tract illnesses
Source: BMC Health Serv Res. 2013 Aug 17;13:322. doi: 10.1186/1472-6963-13-322 (PMC3765099; doi:10.1186/1472-6963-13-322)
Supplement: Additional file 1 — The TARGET cohort study case report form (CRF). [file 1472-6963-13-322-S1.pdf]

# CASE REPORT FORM

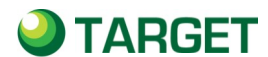

|                                                           |                                                                                                       |                                                                                                                   |                                                                                                                                                                    |                                                                                                                                                                                            |
|-----------------------------------------------------------|-------------------------------------------------------------------------------------------------------|-------------------------------------------------------------------------------------------------------------------|--------------------------------------------------------------------------------------------------------------------------------------------------------------------|--------------------------------------------------------------------------------------------------------------------------------------------------------------------------------------------|
| <b>ID</b> 999999<br><b>Today's date</b><br>DD / MM / 20YY | <b>Background information</b><br><b>DOB</b> DD / MM / YYYY                                            |                                                                                                                   | <b>Mother's age</b>                                                                                                                                                | <b># children in home</b> (inc. unwell child)                                                                                                                                              |
|                                                           | <b>Gender</b> <input type="checkbox"/> Female <sub>0</sub> <input type="checkbox"/> Male <sub>1</sub> | <b>Ethnicity</b> <input type="checkbox"/> <small>PTO for codes, if other ethnicity, please describe below</small> | <b>Does the mother smoke?</b> <input type="checkbox"/> No <sub>0</sub> <input type="checkbox"/> Yes <sub>1</sub> <input type="checkbox"/> Don't know <sub>88</sub> | <b>Mother still breast feeding child at 3 months?</b> <input type="checkbox"/> No <sub>0</sub> <input type="checkbox"/> Yes <sub>1</sub> <input type="checkbox"/> Don't know <sub>88</sub> |

**Carer reported symptoms**

How unwell does the **parent** consider the child to be? Well ☐ 0 ☐ 1 ☐ 2 ☐ 3 ☐ 4 ☐ 5 ☐ 6 ☐ 7 ☐ 8 ☐ 9 ☐ 10 ☐ Very unwell

Duration of illness ☐ days

Has illness got a lot worse recently? ☐ No<sub>0</sub> ☐ Yes<sub>1</sub>

If Yes, how many days ago did it start to get worse? ☐ days

| Symptoms present                                                                                                                   | During illness?          |                          |                          | Last 24 hours?           |                          |                          | Severity in last 24 hours (tick <b>one</b> ) |                          |                          |
|------------------------------------------------------------------------------------------------------------------------------------|--------------------------|--------------------------|--------------------------|--------------------------|--------------------------|--------------------------|----------------------------------------------|--------------------------|--------------------------|
|                                                                                                                                    | No <sub>0</sub>          | Yes <sub>1</sub>         | If yes                   | No <sub>0</sub>          | Yes <sub>1</sub>         | If yes                   | Mild <sub>1</sub>                            | Moderate <sub>2</sub>    | Severe <sub>3</sub>      |
| Dry cough                                                                                                                          | <input type="checkbox"/>                     | <input type="checkbox"/> | <input type="checkbox"/> |
| Productive/ wet cough                                                                                                              | <input type="checkbox"/>                     | <input type="checkbox"/> | <input type="checkbox"/> |
| Barking/ croupy cough                                                                                                              | <input type="checkbox"/>                     | <input type="checkbox"/> | <input type="checkbox"/> |
| Blocked or runny nose                                                                                                              | <input type="checkbox"/>                     | <input type="checkbox"/> | <input type="checkbox"/> |
| Change in cry                                                                                                                      | <input type="checkbox"/>                     | <input type="checkbox"/> | <input type="checkbox"/> |
| Breathing faster than normal (shortness of breath)                                                                                 | <input type="checkbox"/>                     | <input type="checkbox"/> | <input type="checkbox"/> |
| Wheeze or whistling in the chest                                                                                                   | <input type="checkbox"/>                     | <input type="checkbox"/> | <input type="checkbox"/> |
| Fever                                                                                                                              | <input type="checkbox"/>                     | <input type="checkbox"/> | <input type="checkbox"/> |
| Chills/ shivering                                                                                                                  | <input type="checkbox"/>                     | <input type="checkbox"/> | <input type="checkbox"/> |
| Diarrhoea                                                                                                                          | <input type="checkbox"/>                     | <input type="checkbox"/> | <input type="checkbox"/> |
| Vomiting (including after cough)                                                                                                   | <input type="checkbox"/>                     | <input type="checkbox"/> | <input type="checkbox"/> |
| Taking fewer fluids/ milk feeds                                                                                                    | <input type="checkbox"/>                     | <input type="checkbox"/> | <input type="checkbox"/> |
| Eating less                                                                                                                        | <input type="checkbox"/>                     | <input type="checkbox"/> | <input type="checkbox"/> |
| Low energy/ fatigue/ lethargy                                                                                                      | <input type="checkbox"/>                     | <input type="checkbox"/> | <input type="checkbox"/> |
| Disturbed sleep                                                                                                                    | <input type="checkbox"/>                     | <input type="checkbox"/> | <input type="checkbox"/> |
| Passing urine less often/ dryer nappies                                                                                            | <input type="checkbox"/>                     | <input type="checkbox"/> | <input type="checkbox"/> |
| Please tick NA if the child is too young/ uncommunicative for the parent to know about the following > NA <input type="checkbox"/> |                          |                          |                          |                          |                          |                          |                                              |                          |                          |
| Chest/ shoulder pain                                                                                                               | <input type="checkbox"/>                     | <input type="checkbox"/> | <input type="checkbox"/> |
| Headache                                                                                                                           | <input type="checkbox"/>                     | <input type="checkbox"/> | <input type="checkbox"/> |
| Muscle aches all over                                                                                                              | <input type="checkbox"/>                     | <input type="checkbox"/> | <input type="checkbox"/> |
| Confusion/ disorientation                                                                                                          | <input type="checkbox"/>                     | <input type="checkbox"/> | <input type="checkbox"/> |

**Clinician examination and management**

Temperature ☐ °C Pulse ☐ bpm

Pallor ☐ Absent<sub>0</sub> ☐ Present<sub>1</sub>

Respiratory rate ☐ bpm O<sub>2</sub> sat ☐ % ☐ Unable to take O<sub>2</sub> sat/no equipment

Grunting ☐ Nasal flaring ☐ Stridor ☐

Consciousness level ☐ normal<sub>0</sub> ☐ irritable<sub>1</sub> ☐ drowsy<sub>2</sub>

Inter/ subcostal recession ☐ Inflamed pharynx/ tonsils ☐

Capillary refill time ☐ 2 seconds or less<sub>0</sub> ☐ 3 seconds or more<sub>1</sub>

Wheeze ☐ Absent<sub>0</sub> ☐ Unilateral<sub>1</sub> ☐ Bilateral<sub>2</sub>

Crackles/ crepitations ☐ Bronchial breathing ☐

How unwell do **you** consider the child to be? Well ☐ 0 ☐ 1 ☐ 2 ☐ 3 ☐ 4 ☐ 5 ☐ 6 ☐ 7 ☐ 8 ☐ 9 ☐ 10 ☐ Very unwell

Throat swab taken? ☐ No<sub>0</sub> ☐ Yes<sub>1</sub>

If **No**, reason:  
☐ Child refusal<sub>1</sub>  
☐ Parent refusal<sub>2</sub>  
☐ Other (specify)<sub>3</sub>

Main working respiratory tract diagnosis ☐

My gut feeling is 'something is wrong' ☐ No<sub>0</sub> ☐ Yes<sub>1</sub>

Antibiotics prescribed? ☐ No<sub>0</sub> ☐ Yes, immediate<sub>1</sub> ☐ Yes, delayed<sub>2</sub> by ☐ days

Referral for acute admission today? ☐ No<sub>0</sub> ☐ Yes<sub>1</sub>

## Ethnicity showcard

*To which of these ethnic groups do you consider your child belongs? / What is your ethnic group?*

### **White**

- 1 British
- 2 Irish
- 3 Any Other White background (please describe to the doctor or nurse)

### **Mixed**

- 4 White and Black Caribbean
- 5 White and Black African
- 6 White and Asian
- 7 Any Other Mixed background (please describe to the doctor or nurse)

### **Asian or Asian British**

- 8 Indian
- 9 Pakistani
- 10 Bangladeshi
- 11 Any Other Asian background (please describe to the doctor or nurse)

### **Black or Black British**

- 12 Caribbean
- 13 African
- 14 Any Other Black background (please describe to the doctor or nurse)

### **Chinese**

- 15 Chinese

### **Other ethnic group**

- 16 Any Other (please describe to the doctor or nurse)

*To the clinician: please record the number corresponding to the patients response in the case report form ethnicity box along with any additional description about their ethnicity the patient may wish to provide*

For TARGET study office use only

*Date received at Bristol centre*
